# Supplementary material for: Towards Personalised Contrast Injection: Artificial-Intelligence-Derived Body Composition and Liver Enhancement in Computed Tomography
Source: MDPI journal article supplement (doi:10.3390/jpm11030159), 2021-02-24
Supplement: s1 [file s1]

**Table 1.** Correlations in regression.

| Correlations                             | BMI ( <i>r</i> ) | BMI ( <i>p</i> ) | TBW ( <i>r</i> ) | TBW ( <i>p</i> ) | %LBW ( <i>r</i> ) | %LBW ( <i>p</i> ) |
|------------------------------------------|------------------|------------------|------------------|------------------|-------------------|-------------------|
| $\Delta\text{HU}/\text{gI}$              | -0.393           | 0.253            | -0.531           | 0.000            | 0.323             | 0.493             |
| $\Delta\text{HU}/(\text{gI}/\text{TBW})$ | -0.645           | 0.139            | -0.698           | 0.302            | 0.597             | 0.628             |
| $\Delta\text{HU}/(\text{gI}/\text{LBW})$ | 0.190            | 0.099            | 0.152            | 0.371            | -0.733            | 0.000             |

Correlations of  $\Delta\text{HU}/\text{gI}$ ,  $\Delta\text{HU}/(\text{gI}/\text{TBW})$  and  $\Delta\text{HU}/(\text{gI}/\text{LBW})$  with BMI, TBW and %LBW. Values are R-values and p-values. (TBW: total body weight; BMI: body mass index; LBW: lean body weight).

**Table 2.** Enhancement values per group.

| Enhancement | Group $\leq 70$ kg |      | Group 70 – 90 kg |      | Group $\geq 90$ kg |      |
|-------------|--------------------|------|------------------|------|--------------------|------|
| < 40 HU     | 0                  | 0.0% | 5                | 8.1% | 1                  | 5.0% |
| >70 HU      | 6                  | 30%  | 3                | 4.8% | 0                  | 0.0% |
| < 50 HU     | 4                  | 20%  | 20               | 30%  | 7                  | 35%  |

Number of enhancement values < 40 HU, > 70 HU, and < 50 HU. Values are the number of patients and percentages are proportions of weight group.

**Table 3.** Subjective phase classification per rater.

|                            | Timing (M.K.) |       | Timing (F.W.) |       |
|----------------------------|---------------|-------|---------------|-------|
| Too early (non-diagnostic) | 0             | 0.0%  | 0             | 0.0%  |
| Early                      | 0             | 0.0%  | 0             | 0.0%  |
| Good                       | 87            | 85.3% | 90            | 88.2% |
| Late                       | 15            | 14.7% | 12            | 11.8% |
| Too late (non-diagnostic)  | 0             | 0.0%  | 0             | 0.0%  |

Subjective phase scores on a five-point scale of M.K. and F.W. in numbers and percentages of the total population.

**Table 4.** Subjective enhancement classification on the four-point Likert scale per rater.

|                | Enhancement (M.K.) |       | Enhancement (F.W.) |       |
|----------------|--------------------|-------|--------------------|-------|
| Excellent      | 69                 | 67.6% | 68                 | 66.7% |
| Good           | 29                 | 25.5% | 27                 | 26.5% |
| Moderate       | 6                  | 5.9%  | 7                  | 6.9%  |
| Non-diagnostic | 1                  | 1.0%  | 0                  | 0.0%  |

Subjective enhancement scores on a four-point Likert scale of M.K. and F.W. in numbers and percentages of the total population.
